# Supplementary material
Source: PubMed Central journal article supplement (PMC3834658)
Supplement: DS_10.1177_0022034513509281.pdf [file DS_10.1177_0022034513509281.pdf]

# RESEARCH REPORTS

## Clinical

M.E. Nunn<sup>1\*</sup>, M.D. Fish<sup>2†</sup>, R.I. Garcia<sup>2,3</sup>,  
E.K. Kaye<sup>2</sup>, R. Figueroa<sup>4‡</sup>, A. Gohel<sup>5</sup>, M. Ito<sup>6</sup>,  
H.J. Lee<sup>7</sup>, D.E. Williams<sup>8</sup>, and T. Miyamoto<sup>1</sup>

<sup>1</sup>Creighton University School of Dentistry, Department of Periodontology, Omaha, NE, USA; <sup>2</sup>Boston University Henry M. Goldman School of Dental Medicine, Department of Health Policy and Health Services Research, Boston, MA, USA; <sup>3</sup>VA Boston Healthcare System, Boston, MA, USA; <sup>4</sup>Boston University Henry M. Goldman School of Dental Medicine, Department of Oral and Maxillofacial Surgery, Boston, MA, USA; <sup>5</sup>Boston University Henry M. Goldman School of Dental Medicine, Department of Oral and Maxillofacial Radiology, Boston, MA, USA; <sup>6</sup>Nihon University School of Dentistry at Matsudo, Department of Removable Prosthodontics, Chiba, Japan; <sup>7</sup>Seoul National University Bundang Hospital, Department of Periodontology, Seongnam-si, Korea; <sup>8</sup>Creighton University School of Dentistry, Department of Oral and Maxillofacial Surgery, Omaha, NE, USA; and <sup>†</sup>Private practice, Hartsdale, NY, USA; <sup>‡</sup>Private practice, Orlando, FL, USA; \*corresponding author, nunn@creighton.edu

# Retained Asymptomatic Third Molars and Risk for Second Molar Pathology

*J Dent Res* DOI: 10.1177/0022034513509281

## APPENDIX

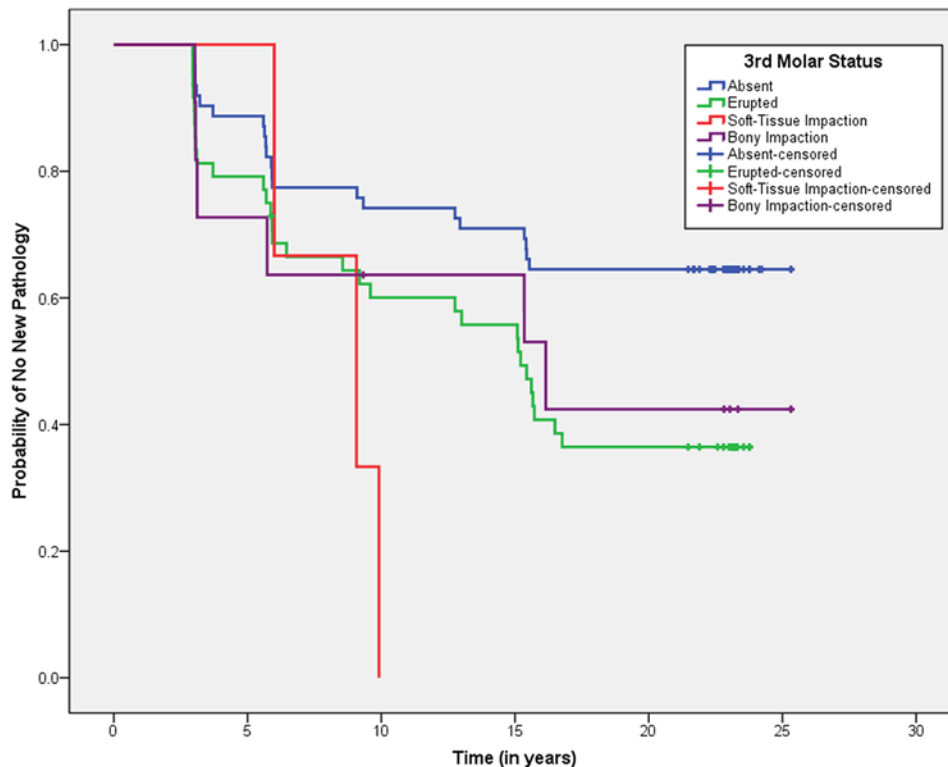

**Appendix Figure 1.** Survival plot for any incident pathology on distal of second molar by status of adjacent third molar for subset of subjects with absent third molar on one side and existing third molar on opposite side

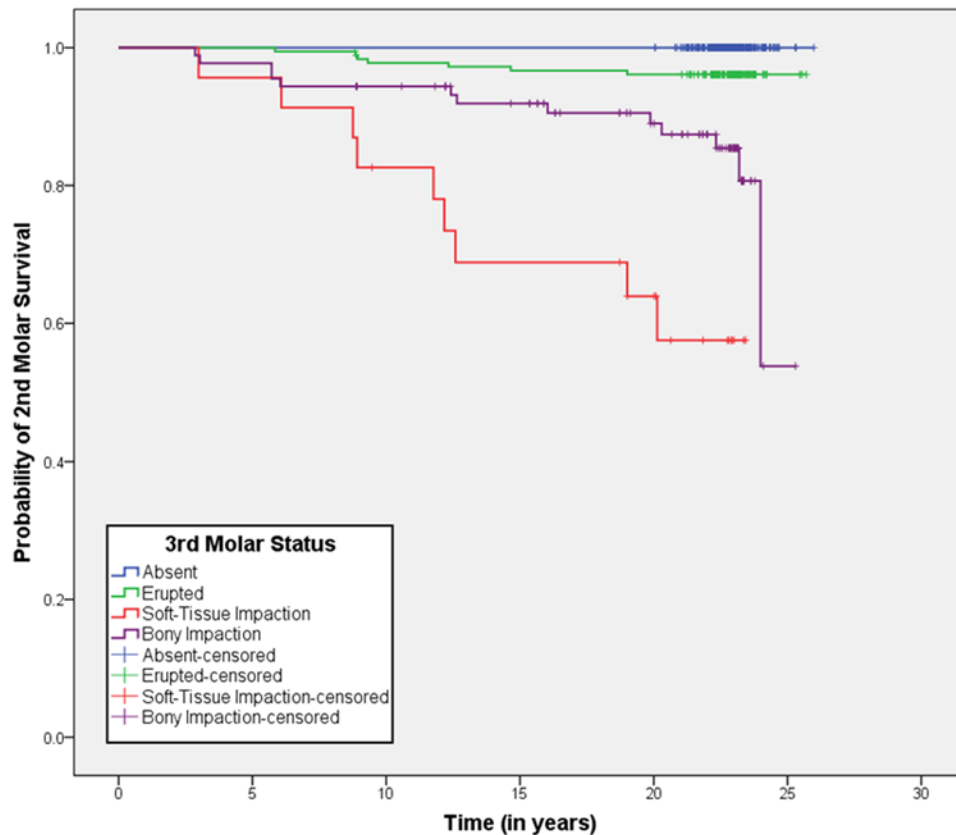

**Appendix Figure 2.** Survival plot for second molar tooth loss by status of adjacent third molar.

**Appendix Table 1.** Distribution of Baseline Second Molar Distal Surface, Bone Loss, and Probing Depth by Third Molar Status

| Second Molar                  | Baseline Third Molar Status, % (n) |                               |                               |                        |
|-------------------------------|------------------------------------|-------------------------------|-------------------------------|------------------------|
|                               | Absent, n = 460                    | Erupted, n = 196 <sup>a</sup> | Soft Tissue Impaction, n = 25 | Bony Impaction, n = 89 |
| Distal coronal surface        |                                    |                               |                               |                        |
| Sound                         | 71.1 (327)                         | 60.0 (138)                    | 68.0 (17)                     | 83.2 (74)              |
| Filled                        | 22.8 (105)                         | 28.3 (65)                     | 24.0 (6)                      | 14.6 (13)              |
| Primary caries                | 3.3 (15)                           | 6.1 (14)                      | 4.0 (1)                       | 1.1 (1)                |
| Secondary caries              | 2.8 (13)                           | 5.7 (13)                      | 4.0 (1)                       | 1.1 (1)                |
| Distal bone loss <sup>a</sup> |                                    |                               |                               |                        |
| None                          | 52.2 (240)                         | 55.1 (108)                    | 28.0 (7)                      | 51.7 (46)              |
| < 20%                         | 41.7 (192)                         | 35.7 (70)                     | 44.0 (11)                     | 31.5 (28)              |
| 20%-40%                       | 5.2 (24)                           | 8.2 (16)                      | 20.0 (5)                      | 12.4 (11)              |
| > 40%                         | 0.9 (4)                            | 1.0 (2)                       | 8.0 (2)                       | 4.5 (4)                |
| Distal probing depth, mm      |                                    |                               |                               |                        |
| ≤ 2                           | 33.5 (154)                         | 37.8 (74)                     | 12.0 (3)                      | 30.3 (27)              |
| > 2 to ≤ 3                    | 37.2 (171)                         | 34.7 (68)                     | 20.0 (5)                      | 36.0 (32)              |
| > 3 to ≤ 4                    | 19.8 (91)                          | 20.4 (40)                     | 36.0 (9)                      | 27.0 (24)              |
| > 4                           | 9.6 (44)                           | 7.1 (14)                      | 32.0 (8)                      | 6.7 (6)                |

<sup>a</sup>n = 230 for distal coronal surface.

**Appendix Table 2.** Generalized Estimating Equation Logistic Regression for Prevalent Pathologies of Distal of Second Molar

| Third Molar Status           | Odds Ratio | 95% Confidence Interval | p <sup>a</sup> |
|------------------------------|------------|-------------------------|----------------|
| Caries Experience            |            |                         |                |
| Absent                       | Reference  | —                       | < .001         |
| Erupted                      | 1.73       | 1.23, 2.43              |                |
| Soft tissue impaction        | 1.24       | 0.61, 2.52              |                |
| Bony impaction               | 0.55       | 0.30, 1.01              |                |
| Distal Bone Loss, ≥ 20%      |            |                         |                |
| Absent                       | Reference  | —                       | .037           |
| Erupted                      | 1.59       | 0.85, 2.95              |                |
| Soft tissue impaction        | 4.93       | 1.59, 15.2              |                |
| Bony impaction               | 2.64       | 1.31, 5.34              |                |
| Distal Probing Depth, > 4 mm |            |                         |                |
| Absent                       | Reference  | —                       | .067           |
| Erupted                      | 0.76       | 0.42, 1.40              |                |
| Soft tissue impaction        | 3.98       | 1.57, 10.1              |                |
| Bony impaction               | 0.58       | 0.23, 1.47              |                |

<sup>a</sup>Values are based on generalized estimating equation logistic regression models comparing third molar status impact on prevalence of caries experience, bone loss, and probing depth of distal of adjacent second molars while adjusting for age, smoking status, and educational status.

**Appendix Table 3.** Survival Analysis for Any Incident Pathology on Distal of Adjacent Second Molar for a Subset With Absent Third Molar on One Side and Erupted/Impacted Third Molar on Opposite Side (n = 54 subjects, n = 124 teeth)

| Third Molar Status    | Relative Risk | 95% Confidence Interval | p <sup>a</sup> |
|-----------------------|---------------|-------------------------|----------------|
| Absent                | Reference     | —                       | < .001         |
| Erupted               | 2.14          | 1.27, 3.58              |                |
| Soft tissue impaction | 6.25          | 3.29, 11.9              |                |
| Bony impaction        | 2.49          | 1.17, 5.28              |                |

<sup>a</sup>Value is based on marginal multivariate survival regression models comparing third molar status impact on incident pathology on distal of adjacent second molars while adjusting for age, smoking status, and educational status.
